# Supplementary material for: Exploration of Potential Target Genes of miR-24-3p in Chicken Myoblasts by Transcriptome Sequencing Analysis
Source: MDPI journal article supplement (doi:10.3390/genes14091764), 2023-09-05
Supplement: s1 [file s1]

**Supplementary Table S1.** Primers used in this study.

| Gene    | Primer<br>name | Primer sequences          | T <sub>m</sub> (°C) |
|---------|----------------|---------------------------|---------------------|
| REEP1   | REEP1-F        | ACAATTCGTGGTGACAGCAGCAG   | 60                  |
|         | REEP1-R        | GGAGTCGGCATACTGAGCAACAC   |                     |
| ST6GAL1 | ST6GAL1-F      | CAGCCTAACCCACCGTCTTCAG    | 60                  |
|         | ST6GAL1-R      | GTCCGTCTGCCGCTTAGAAGG     |                     |
| ASB15   | ASB15-F        | AGCTGGCTATGTGGGAAACGTC    | 60                  |
|         | ASB15-R        | GGAGTGGAGTCTCGCCTTTGTC    |                     |
| EIF5B   | EIF5B-F        | GATGATGACCGCACCAAGGAAGAG  | 60                  |
|         | EIF5B-R        | GGGCACATTAGTCGCACCTATCTG  |                     |
| IQSEC3  | IQSEC3-F       | GCAGGACAAGGAGAAGGAAGAAGG  | 60                  |
|         | IQSEC3-R       | TGGACACCGAGGTAGACGATGAG   |                     |
| SUOX    | SUOX-F         | TGGAAGGTGGCGAGGCTGATG     | 60                  |
|         | SUOX-R         | GTCGGGCTGCACGTTGTAAGT     |                     |
| NEURL1  | NEURL1-F       | TCTGGGCTTTGATTGATGTCTACGG | 60                  |
|         | NEURL1-R       | CGCAGGCAGTCAGGAGGAATG     |                     |
| RBM15   | RBM15-F        | AGGGAGCGACTGGTGGGAAAG     | 60                  |
|         | RBM15-R        | CTGCGGAGCGGTTGTCTGATG     |                     |
| β-actin | β-actin-F      | CAGCCATCTTTCTTGGGTAT      | 60                  |
|         | β-actin-R      | CTGTGATCTCCTTCTGCATCC     |                     |

**Supplementary Table S2.** The list of 189 DEGs.

| gene_name           | gene_chr       | gene_length | gene_biotype   |
|---------------------|----------------|-------------|----------------|
| FRMD3               | Z              | 3419        | protein_coding |
| ENSGALG000000048328 | 1              | 550         | lncRNA         |
| ENSGALG000000050667 | AADN05001176.1 | 1225        | lncRNA         |
| SUOX                | 33             | 1377        | protein_coding |
| ENSGALG000000053624 | 25             | 917         | lncRNA         |
| MRPL4               | 30             | 1807        | protein_coding |
| RBM15               | 26             | 2868        | protein_coding |
| ENSGALG000000048802 | 2              | 294         | protein_coding |
| ASB15               | 1              | 1854        | protein_coding |

|                  |            |      |                |
|------------------|------------|------|----------------|
| -                | 10         | 531  | -              |
| NEURL1           | 6          | 3537 | protein_coding |
| CCS              | 33         | 1182 | protein_coding |
| ENSGALG000000055 | 33         | 2405 | lncRNA         |
| 106              |            |      |                |
| ENSGALG000000054 | 31         | 1889 | protein_coding |
| 496              |            |      |                |
| SAPCD2           | 17         | 1566 | protein_coding |
| ENSGALG000000046 | 27         | 2289 | protein_coding |
| 412              |            |      |                |
| ENSGALG000000048 | 7          | 1320 | protein_coding |
| 310              |            |      |                |
| -                | KZ626833.1 | 425  | -              |
| MED11            | KZ626839.1 | 354  | protein_coding |
| ENSGALG000000054 | KZ626839.1 | 2450 | protein_coding |
| 402              |            |      |                |
| STX1A            | 19         | 2590 | protein_coding |
| HMGA1            | 26         | 378  | protein_coding |
| EIF5B            | 1          | 4437 | protein_coding |
| ENSGALG000000049 | 33         | 3997 | protein_coding |
| 557              |            |      |                |
| FIS1             | 15         | 1686 | protein_coding |
| ENSGALG000000037 | 2          | 2612 | protein_coding |
| 112              |            |      |                |
| -                | 3          | 536  | -              |
| ENSGALG000000053 | 6          | 309  | protein_coding |
| 749              |            |      |                |
| ENSGALG000000053 | 25         | 2025 | protein_coding |
| 285              |            |      |                |
| -                | KZ626833.1 | 449  | -              |
| ENSGALG000000054 | 2          | 3212 | lncRNA         |
| 453              |            |      |                |
| SAMD5            | 3          | 468  | protein_coding |
| ATP6V0D2         | 2          | 1760 | protein_coding |
| ENSGALG000000050 | 2          | 195  | protein_coding |
| 691              |            |      |                |
| IQGAP2           | Z          | 5846 | protein_coding |
| -                | 22         | 2397 | -              |
| ENSGALG000000042 | 2          | 8587 | protein_coding |
| 375              |            |      |                |
| EVA1B            | 23         | 1173 | protein_coding |
| ENSGALG000000049 | 5          | 2338 | protein_coding |
| 369              |            |      |                |
| ENSGALG000000046 | 33         | 8129 | protein_coding |

---

|                     |                |      |                |
|---------------------|----------------|------|----------------|
| 210                 |                |      |                |
| ALPL                | 21             | 1603 | protein_coding |
| TXLNB               | 3              | 4840 | protein_coding |
| -                   | 33             | 1807 | -              |
| MYL6                | 33             | 1603 | protein_coding |
| ENSGALG000000054667 | 16             | 2133 | protein_coding |
| ENSGALG000000047565 | 33             | 2247 | protein_coding |
| ENSGALG000000054310 | 18             | 3246 | protein_coding |
| ENSGALG000000053046 | 7              | 1515 | protein_coding |
| HAX1                | 25             | 1426 | protein_coding |
| ENSGALG000000031572 | 33             | 2317 | protein_coding |
| ENSGALG000000029783 | AADN05001439.1 | 1344 | protein_coding |
| ENSGALG000000054941 | 1              | 1222 | lncRNA         |
| ALDH1L2             | 1              | 3492 | protein_coding |
| ENSGALG000000052702 | 9              | 288  | protein_coding |
| PTGS2               | 8              | 5101 | protein_coding |
| ENSGALG000000048475 | KZ626835.1     | 3552 | pseudogene     |
| FOXC1               | 2              | 1572 | pseudogene     |
| ENSGALG000000053925 | AADN05001161.1 | 4012 | protein_coding |
| REEP1               | 4              | 3261 | protein_coding |
| ENSGALG000000050575 | 11             | 750  | pseudogene     |
| ENSGALG000000048280 | 2              | 1644 | protein_coding |
| NNF1                | 23             | 2287 | protein_coding |
| RBM8A               | 25             | 492  | protein_coding |
| OPCML               | 24             | 1624 | protein_coding |
| DHRS7C              | 18             | 1174 | protein_coding |
| ENSGALG000000041560 | KZ626826.1     | 5650 | protein_coding |
| ENSGALG000000047953 | KZ626837.1     | 768  | protein_coding |
| ENSGALG000000049992 | 4              | 1335 | lncRNA         |

---

---

|                 |    |       |                |
|-----------------|----|-------|----------------|
| ENSGALG00000051 | 2  | 1965  | protein_coding |
| 993             |    |       |                |
| ENSGALG00000026 | 12 | 381   | protein_coding |
| 449             |    |       |                |
| PDLIM4          | 13 | 1331  | protein_coding |
| TINAGL1         | 23 | 1528  | protein_coding |
| VAV3            | 8  | 5150  | protein_coding |
| SLA             | 2  | 2971  | protein_coding |
| -               | 1  | 1048  | -              |
| FLNA            | 27 | 4840  | protein_coding |
| JCHAIN          | 4  | 1815  | protein_coding |
| ADAM19          | 13 | 2703  | protein_coding |
| ENSGALG00000015 | 1  | 2100  | protein_coding |
| 822             |    |       |                |
| LSM1            | 22 | 756   | protein_coding |
| ENSGALG00000042 | 4  | 1969  | protein_coding |
| 151             |    |       |                |
| ENSGALG00000048 | 30 | 288   | protein_coding |
| 899             |    |       |                |
| -               | 12 | 9964  | -              |
| ENSGALG00000022 | 5  | 465   | protein_coding |
| 531             |    |       |                |
| ZFPM2           | 2  | 3564  | protein_coding |
| ENSGALG00000051 | 5  | 11985 | pseudogene     |
| 922             |    |       |                |
| -               | 32 | 602   | -              |
| CITED2          | 3  | 902   | protein_coding |
| ENSGALG00000041 | 5  | 291   | protein_coding |
| 565             |    |       |                |
| ENSGALG00000050 | 14 | 6355  | protein_coding |
| 166             |    |       |                |
| ENSGALG00000048 | 33 | 2439  | protein_coding |
| 773             |    |       |                |
| CDC26           | 17 | 1255  | protein_coding |
| GOLGA4          | 2  | 7646  | protein_coding |
| ID4             | 2  | 1134  | protein_coding |
| ENSGALG00000014 |    | 2378  | protein_coding |
| 857             |    |       |                |
| OGN             | 12 | 2135  | protein_coding |
| MMP13           | 1  | 2845  | protein_coding |
| GDF11           | 33 | 1678  | protein_coding |
| MYOM2           | 3  | 5286  | protein_coding |
| ENSGALG00000031 | 3  | 3524  | protein_coding |
| 262             |    |       |                |

---

|                     |            |      |                |
|---------------------|------------|------|----------------|
| EMILIN3             | 20         | 2664 | protein_coding |
| ANKRD1              | 6          | 3202 | protein_coding |
| ENSGALG00000049232  | 33         | 1513 | protein_coding |
| ENSGALG00000048077  | 10         | 588  | protein_coding |
| SLC4A10             | 7          | 3606 | protein_coding |
| ALX4                | 5          | 1164 | protein_coding |
| MYL10               | 19         | 1415 | protein_coding |
| ENSGALG00000045898  | 7          | 3303 | protein_coding |
| -                   | 33         | 1153 | -              |
| LRRC39              | 8          | 1588 | protein_coding |
| KBTBD11             | 3          | 2336 | protein_coding |
| COL8A2              | 23         | 2439 | protein_coding |
| C3AR1               | 1          | 1873 | protein_coding |
| gga-mir-145         | 13         | 85   | miRNA          |
| 5_8S_rRNA           | 16         | 153  | rRNA           |
| -                   | 1          | 1168 | -              |
| GDF7                | 3          | 1203 | protein_coding |
| ENSGALG00000005814  | Z          | 2037 | protein_coding |
| CCR2                | 2          | 3650 | protein_coding |
| CCDC141             | 7          | 5308 | protein_coding |
| -                   | 30         | 1517 | -              |
| LVRN                | Z          | 4092 | protein_coding |
| ENSGALG000000054366 | 31         | 3347 | protein_coding |
| IL18                | 24         | 2112 | protein_coding |
| ENSGALG00000047981  | 32         | 1968 | protein_coding |
| ENSGALG00000047805  | 30         | 1266 | protein_coding |
| ENSGALG000000050395 | 19         | 1839 | protein_coding |
| OTULIN              | 2          | 1084 | protein_coding |
| ENSGALG00000047027  | 2          | 2915 | protein_coding |
| ENSGALG00000048991  | KZ626826.1 | 3203 | protein_coding |
| TLR15               | 3          | 3341 | protein_coding |
| SYP                 | 31         | 1881 | protein_coding |
| HDDC3               | 10         | 598  | protein_coding |
| -                   | 5          | 3081 | -              |

|                     |            |      |                |
|---------------------|------------|------|----------------|
| -                   | AADN0500   | 315  | -              |
|                     | 1253.1     |      |                |
| LMOD3               | 12         | 1575 | protein_coding |
| ENSGALG00000015203  | 28         | 1664 | protein_coding |
| TAF4B               | 2          | 2597 | protein_coding |
| ENSGALG000000051467 | 25         | 5451 | lncRNA         |
| APCDD1L             | 20         | 1491 | protein_coding |
| IQSEC3              | 1          | 3749 | protein_coding |
| -                   | 2          | 602  | -              |
| ENSGALG000000031447 | 22         | 1014 | pseudogene     |
| PLN                 | 3          | 159  | protein_coding |
| ENSGALG000000011177 | 1          | 2238 | protein_coding |
| ENSGALG000000052818 | 11         | 1869 | protein_coding |
| CDK20               | 13         | 2311 | protein_coding |
| ENSGALG000000054572 | 12         | 1119 | protein_coding |
| -                   | 33         | 1028 | -              |
| ENSGALG000000007123 | 4          | 2112 | protein_coding |
| TRPM2               | 9          | 5508 | protein_coding |
| MYOT                | 13         | 2307 | protein_coding |
| ABCG2               | 6          | 3026 | protein_coding |
| SOX18               | 20         | 1585 | protein_coding |
| SMPX                | 1          | 3083 | protein_coding |
| ENSGALG000000050494 | KZ626819.1 | 2864 | protein_coding |
| VPS9D1              | 11         | 1506 | protein_coding |
| PPFIBP2             | 5          | 4697 | protein_coding |
| POU3F4              | 4          | 744  | protein_coding |
| ENSGALG000000047526 | 5          | 1059 | protein_coding |
| ENSGALG000000035685 | MT         | 76   | Mt_tRNA        |
| TSPAN31             | 33         | 1029 | protein_coding |
| -                   | 15         | 1448 | -              |
| ENSGALG000000040995 | 7          | 7842 | protein_coding |
| REPS2               | 1          | 5572 | protein_coding |
| GNAZ                | 15         | 2821 | protein_coding |

|                     |    |       |                |
|---------------------|----|-------|----------------|
| MYOZ1               | 6  | 837   | protein_coding |
| ENSGALG000000050325 | 26 | 4427  | lncRNA         |
| ENSGALG000000019934 | 3  | 393   | protein_coding |
| SNORD127            | 5  | 86    | snoRNA         |
| ENSGALG000000054086 | 14 | 525   | protein_coding |
| ENSGALG000000002511 | 26 | 1845  | protein_coding |
| ENSGALG000000026553 | Z  | 13242 | protein_coding |
| FKBP2               | 33 | 1500  | protein_coding |
| TMEM184A            | 14 | 1760  | protein_coding |
| PPP1R3A             | 1  | 4163  | protein_coding |
| KCND2               | 1  | 1899  | protein_coding |
| ENSGALG000000048343 | 11 | 2636  | protein_coding |
| ST6GAL1             | 9  | 3926  | protein_coding |
| -                   | 2  | 1285  | -              |
| NRCAM               | 1  | 7836  | protein_coding |
| ENSGALG000000046160 | 4  | 1166  | protein_coding |
| ENSGALG000000047158 | 7  | 1613  | lncRNA         |
| ENSGALG000000054048 | 19 | 1028  | protein_coding |
| NTM                 | 24 | 2818  | protein_coding |
| ASCL3               | 5  | 1997  | protein_coding |
| HPSE                | 4  | 2383  | protein_coding |
| TDRKH               | 25 | 1680  | protein_coding |
| ENSGALG000000047993 | 3  | 295   | protein_coding |
